# Supplementary material for: Flavones as Quorum Sensing Inhibitors Identified by a Newly Optimized Screening Platform Using Chromobacterium violaceum as Reporter Bacteria
Source: PubMed Central journal article supplement (PMC6273190; doi:10.3390/molecules21091211), 2016-09-10
Supplement: molecules-21-01211-s001.pdf [file molecules-21-01211-s001.pdf]

# Supplementary Materials: Flavones as Quorum Sensing Inhibitors Identified by a Newly Optimized Screening Platform Using *Chromobacterium violaceum* as Reporter Bacteria

Malena E. Skogman, Sonja Kanerva, Suvi Manner, Pia M. Vuorela and Adyary Fallarero

Table S1. Optimization conditions.

| ATCC 31532   |            |               | Aerobic |           | Microaerophilic § |           |
|--------------|------------|---------------|---------|-----------|-------------------|-----------|
| Medium       | Additive   | Concentration | Growth  | Violacein | Growth            | Violacein |
| TSB          |            |               | +++     | ++        | +++               | ++        |
| TSB          | glucose    | 1%            | ++      | +         | NT                | NT        |
| TSB          | YE *       | 0.01%         | +++     | ++        | NT                | NT        |
| TSB          | YE         | 0.10%         | +++     | +++       | +++               | ++        |
| TSB          | YE         | 1%            | +++     | +++       | NT                | NT        |
| TSB          | gluc. + YE | 1% + 1%       | +++     | +         | NT                | NT        |
| TSB          | EDTA       | 1%            | -       | -         | -                 | -         |
| LB           |            |               | +++     | ++        | +++               | +         |
| LB           | glucose    | 1%            | ++      | ++        | NT                | NT        |
| LB           | YE         | 0.01%         | +++     | +++       | NT                | NT        |
| LB           | YE         | 0.10%         | +++     | +++       | +++               | +++       |
| LB           | YE         | 1%            | +++     | +         | NT                | NT        |
| LB           | gluc. + YE | 1% + 1%       | +++     | +         | NT                | NT        |
| LB           | EDTA       | 1%            | -       | -         | -                 | -         |
| <b>CV026</b> |            |               |         |           |                   |           |
| TSB          |            |               | +++     | -         | +++               | -         |
| TSB          | AI **      | 0.1 µM        | +++     | +         | NT                | NT        |
| TSB          | AI         | 0.25 µM       | +++     | ++        | NT                | NT        |
| TSB          | AI         | 0.5 µM        | +++     | +++       | NT                | NT        |
| TSB          | AI         | 1 µM          | +++     | +++       | NT                | NT        |
| TSB-AI ***   | YE         | 1%            | +++     | +++       | NT                | NT        |
| TSB-AI       | gluc. + YE | 1% + 1%       | +++     | +         | NT                | NT        |
| TSB-AI       | EDTA       | 1%            | -       | -         | -                 | -         |
| LB-AI ***    |            |               | +++     | ++        | +++               | +         |
| LB-AI        | glucose    | 1%            | ++      | ++        | NT                | NT        |
| LB-AI        | YE         | 0.01%         | +++     | +++       | NT                | NT        |
| LB-AI        | YE         | 0.10%         | +++     | +++       | +++               | ++        |
| LB-AI        | YE         | 1%            | +++     | +         | NT                | NT        |
| LB-AI        | gluc. + YE | 1% + 1%       | +++     | +         | NT                | NT        |
| LB-AI        | EDTA       | 1%            | -       | -         | -                 | -         |

+++ :dark purple or very high turbidity

++ :light purple or less turbid

+ :very light purple

- :no color or no turbidity

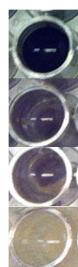

§ Microaerophilic: lower O<sub>2</sub> (3%) and richer CO<sub>2</sub> (17%) levels than the atmosphere; \* YE -yeast extract;

\*\* AI -autoinducer, C<sub>6</sub>-HSL; \*\*\* TSB or LB medium containing 0.5 µM C<sub>6</sub>-HSL.

Table S2. List of the library including data from the screening.

| Cpd Code | TimTec Code | Parent Strain (ATCC 31532)                |                                     |                                      | Mutant Strain CV026                       |                                      | Classification |
|----------|-------------|-------------------------------------------|-------------------------------------|--------------------------------------|-------------------------------------------|--------------------------------------|----------------|
|          |             | Violacein Quantification (at 400 $\mu$ M) | Follow up at 40 $\mu$ M (Violacein) | Viability at 400 $\mu$ M (Resazurin) | Violacein Quantification (at 400 $\mu$ M) | Viability at 400 $\mu$ M (Resazurin) |                |
|          |             | % Inhibition                              | % Inhibition                        | % Inhibition                         | % Inhibition                              | % Inhibition                         |                |
| 1        | ST001473    | 0.0                                       |                                     |                                      | 0.0                                       |                                      |                |
| 2        | ST001551    | 29.1                                      |                                     |                                      | 23.1                                      |                                      |                |
| 3        | ST001553    | 22.1                                      |                                     |                                      | 40.0                                      |                                      |                |
| 4        | ST002033    | 0.0                                       |                                     |                                      | 0.8                                       |                                      |                |
| 5        | ST002041    | 0.0                                       |                                     |                                      | 0.0                                       |                                      |                |
| 6        | ST002042    | 0.0                                       |                                     |                                      | 0.0                                       |                                      |                |
| 7        | ST002045    | 0.0                                       |                                     |                                      | 0.0                                       |                                      |                |
| 8        | ST002046    | 94.0                                      |                                     | 16.7                                 | 94.8                                      | 76.0                                 | Bactericidal   |
| 9        | ST002047    | 92.6                                      |                                     | 0.0                                  | 95.6                                      | 60.0                                 | Bactericidal   |
| 10       | ST002048    | 0.0                                       |                                     |                                      | 0.0                                       |                                      |                |
| 11       | ST002049    | 0.0                                       |                                     |                                      | 0.0                                       |                                      |                |
| 12       | ST002051    | 0.0                                       |                                     |                                      | 0.0                                       |                                      |                |
| 13       | ST002052    | 0.0                                       |                                     |                                      | 0.0                                       |                                      |                |
| 14       | ST002053    | 0.0                                       |                                     |                                      | 30.9                                      |                                      |                |
| 15       | ST002054    | 0.0                                       |                                     |                                      | 2.4                                       |                                      |                |
| 16       | ST002086    | 0.0                                       |                                     |                                      | 0.0                                       |                                      |                |
| 17       | ST002088    | 0.0                                       |                                     |                                      | 0.0                                       |                                      |                |
| 18       | ST002104    | 0.0                                       |                                     |                                      | 22.5                                      |                                      |                |
| 19       | ST004140    | 0.0                                       |                                     |                                      | 37.9                                      |                                      |                |
| 20       | ST004177    | 0.0                                       |                                     |                                      | 10.2                                      |                                      |                |
| 21       | ST004243    | 3.8                                       |                                     |                                      | 18.2                                      |                                      |                |
| 22       | ST005802    | 0.0                                       |                                     |                                      | 14.5                                      |                                      |                |
| 23       | ST007406    | 0.0                                       |                                     |                                      | 0.0                                       |                                      |                |
| 24       | ST008289    | 5.3                                       |                                     |                                      | 0.0                                       |                                      |                |
| 25       | ST008326    | 0.0                                       |                                     |                                      | 20.1                                      |                                      |                |
| 26       | ST008330    | 6.2                                       |                                     |                                      | 53.4                                      |                                      |                |
| 27       | ST008331    | 0.0                                       |                                     |                                      | 1.6                                       |                                      |                |
| 28       | ST014809    | 5.7                                       |                                     |                                      | 0.0                                       |                                      |                |
| 29       | ST019933    | 0.0                                       |                                     |                                      | 0.0                                       |                                      |                |
| 30       | ST019949    | 0.0                                       |                                     |                                      | 0.0                                       |                                      |                |
| 31       | ST020081    | 0.0                                       |                                     |                                      | 0.0                                       |                                      |                |
| 32       | ST020733    | 0.0                                       |                                     |                                      | 22.5                                      |                                      |                |
| 33       | ST020736    | 0.0                                       |                                     |                                      | 53.4                                      |                                      |                |
| 34       | ST021133    | 24.1                                      |                                     |                                      | 8.0                                       |                                      |                |
| 35       | ST021140    | 0.0                                       |                                     |                                      | 0.0                                       |                                      |                |
| 36       | ST023308    | 0.0                                       |                                     |                                      | 0.0                                       |                                      |                |

|    |          |      |     |     |      |      |                   |
|----|----------|------|-----|-----|------|------|-------------------|
| 37 | ST024081 | 11.2 |     |     | 18.0 |      |                   |
| 38 | ST024364 | 22.5 |     |     | 29.7 |      |                   |
| 39 | ST024365 | 0.0  |     |     | 1.1  |      |                   |
| 40 | ST024366 | 16.0 |     |     | 13.7 |      |                   |
| 41 | ST024367 | 13.2 |     |     | 24.8 |      |                   |
| 42 | ST024368 | 5.9  |     |     | 9.4  |      |                   |
| 43 | ST024369 | 2.6  |     |     | 0.0  |      |                   |
| 44 | ST024370 | 0.0  |     |     | 12.8 |      |                   |
| 45 | ST024703 | 17.9 |     |     | 60.5 |      |                   |
| 46 | ST024706 | 70.3 |     | 0.0 | 92.4 | 0.0  | Moderately active |
| 47 | ST024709 | 0.0  |     |     | 0.0  |      |                   |
| 48 | ST024713 | 0.0  |     |     | 56.5 |      |                   |
| 49 | ST024793 | 0.0  |     |     | 53.1 |      |                   |
| 50 | ST026594 | 0.0  |     |     | 0.0  |      |                   |
| 51 | ST030560 | 33.6 |     |     | 71.4 |      |                   |
| 52 | ST031278 | 0.0  |     |     | 7.1  |      |                   |
| 53 | ST031314 | 0.0  |     |     | 3.1  |      |                   |
| 54 | ST031315 | 0.0  |     |     | 0.0  |      |                   |
| 55 | ST031318 | 43.9 |     |     | 69.4 |      |                   |
| 56 | ST031321 | 7.0  |     |     | 0.0  |      |                   |
| 57 | ST035556 | 7.6  |     |     | 0.0  |      |                   |
| 58 | ST035557 | 0.0  |     |     | 0.0  |      |                   |
| 59 | ST035691 | 0.0  |     |     | 0.0  |      |                   |
| 60 | ST038026 | 10.9 |     |     | 40.2 |      |                   |
| 61 | ST038325 | 59.2 |     |     | 72.8 |      |                   |
| 62 | ST041961 | 34.9 |     |     | 59.1 |      |                   |
| 63 | ST045882 | 93.6 | 2.2 | 0.0 | 94.5 | 0.0  | HIT               |
| 64 | ST046822 | 0.0  |     |     | 26.0 |      |                   |
| 65 | ST048880 | 7.3  |     |     | 20.0 |      |                   |
| 66 | ST049545 | 0.0  |     |     | 0.0  |      |                   |
| 67 | ST051039 | 0.0  |     |     | 0.0  |      |                   |
| 68 | ST051246 | 0.0  |     |     | 41.4 |      |                   |
| 69 | ST055360 | 3.2  |     |     | 28.6 |      |                   |
| 70 | ST055361 | 41.2 |     |     | 41.9 |      |                   |
| 71 | ST055362 | 50.3 |     |     | 51.7 |      |                   |
| 72 | ST055363 | 0.0  |     |     | 0.0  |      |                   |
| 73 | ST055364 | 0.0  |     |     | 29.7 |      |                   |
| 74 | ST055366 | 0.0  |     |     | 0.0  |      |                   |
| 75 | ST055367 | 10.6 |     |     | 25.3 |      |                   |
| 76 | ST055368 | 4.9  |     |     | 36.9 |      |                   |
| 77 | ST055369 | 0.0  |     |     | 44.4 |      |                   |
| 78 | ST055624 | 17.1 |     |     | 36.4 |      |                   |
| 79 | ST055650 | 79.8 |     | 1.1 | 97.5 | 89.3 | Bactericidal      |

|     |          |      |      |       |      |      |                   |
|-----|----------|------|------|-------|------|------|-------------------|
| 80  | ST055657 | 0.0  |      |       | 11.4 |      |                   |
| 81  | ST055658 | 49.6 |      | 0.0   | 89.7 | 0.0  | Moderately active |
| 82  | ST055981 | 88.3 | 80.7 | 0.0   | 93.9 | 0.0  | HIT               |
| 83  | ST055982 | 83.6 |      |       | 69.1 |      |                   |
| 84  | ST055983 | 0.0  |      |       | 48.9 |      |                   |
| 85  | ST055984 | 0.0  |      |       | 31.7 |      |                   |
| 86  | ST055986 | 0.0  |      |       | 36.9 |      |                   |
| 87  | ST055987 | 46.8 |      |       | 82.5 |      |                   |
| 88  | ST055988 | 0.0  |      |       | 14.2 |      |                   |
| 89  | ST055989 | 11.8 |      |       | 0.0  |      |                   |
| 90  | ST055991 | 89.0 |      | 0.0   | 85.8 | 93.4 | Bactericidal      |
| 91  | ST055992 | 60.3 |      |       | 28.6 |      |                   |
| 92  | ST055993 | 81.2 |      |       | 72.5 |      |                   |
| 93  | ST055994 | 0.0  |      |       | 5.0  |      |                   |
| 94  | ST055995 | 0.0  |      |       | 0.0  |      |                   |
| 95  | ST055996 | 0.0  |      |       | 0.0  |      |                   |
| 96  | ST055997 | 0.0  |      |       | 47.5 |      |                   |
| 97  | ST055998 | 0.0  |      |       | 40.3 |      |                   |
| 98  | ST055999 | 0.0  |      |       | 16.7 |      |                   |
| 99  | ST056000 | 0.0  |      |       | 36.4 |      |                   |
| 100 | ST056001 | 0.0  |      |       | 7.5  |      |                   |
| 101 | ST056002 | 11.1 |      |       | 50.6 |      |                   |
| 102 | ST056003 | 40.4 |      |       | 82.1 |      |                   |
| 103 | ST056004 | 8.7  |      |       | 3.4  |      |                   |
| 104 | ST056007 | 0.0  |      |       | 0.0  |      |                   |
| 105 | ST056008 | 45.5 |      |       | 47.6 |      |                   |
| 106 | ST056009 | 0.2  |      |       | 41.6 |      |                   |
| 107 | ST056010 | 14.4 |      |       | 59.9 |      |                   |
| 108 | ST056012 | 98.5 |      | 100.9 | 97.9 | 95.6 | Bactericidal      |
| 109 | ST056013 | 27.6 |      |       | 54.4 |      |                   |
| 110 | ST056014 | 58.3 |      | 19.1  | 87.1 | 0.0  | Moderately active |
| 111 | ST056194 | 54.9 |      |       | 69.7 |      |                   |
| 112 | ST056228 | 0.0  |      |       | 46.4 |      |                   |
| 113 | ST056229 | 0.0  |      |       | 17.5 |      |                   |
| 114 | ST056246 | 54.1 |      |       | 75.3 |      |                   |
| 115 | ST056247 | 42.6 |      |       | 73.8 |      |                   |
| 116 | ST056248 | 64.8 |      |       | 71.7 |      |                   |
| 117 | ST056249 | 88.0 | 90.6 | 0.0   | 87.3 | 0.0  | HIT               |
| 118 | ST056250 | 46.7 |      |       | 39.8 |      |                   |
| 119 | ST056251 | 22.7 |      |       | 48.9 |      |                   |
| 120 | ST056252 | 19.6 |      |       | 55.9 |      |                   |
| 121 | ST056253 | 42.1 |      |       | 44.9 |      |                   |
| 122 | ST056254 | 0.0  |      |       | 1.9  |      |                   |

|     |          |      |      |       |      |                   |
|-----|----------|------|------|-------|------|-------------------|
| 123 | ST056255 | 0.0  |      | 29.3  |      |                   |
| 124 | ST056256 | 6.9  |      | 52.9  |      |                   |
| 125 | ST056258 | 19.5 |      | 76.0  |      |                   |
| 126 | ST056259 | 41.6 | 0.0  | 88.6  | 0.0  | Moderately active |
| 127 | ST056288 | 59.1 | 82.3 | 100.1 | 98.0 | Bactericidal      |
| 128 | ST056301 | 0.0  |      | 2.2   |      |                   |
| 129 | ST056352 | 19.0 |      | 38.3  |      |                   |
| 130 | ST057152 | 97.1 | 24.9 | 99.6  | 99.2 | Bactericidal      |
| 131 | ST057176 | 25.5 |      | 0.0   |      |                   |
| 132 | ST057233 | 78.1 | 0.0  | 85.2  | 0.0  | Moderately active |
| 133 | ST057235 | 84.2 | 0.0  | 92.3  | 47.7 | Moderately active |
| 134 | ST057236 | 18.7 |      | 34.9  |      |                   |
| 135 | ST057247 | 0.0  |      | 0.0   |      |                   |
| 136 | ST057268 | 83.7 | 17.1 | 99.5  | 99.4 | Bactericidal      |
| 137 | ST057370 | 0.0  |      | 13.7  |      |                   |
| 138 | ST057371 | 0.0  |      | 0.0   |      |                   |
| 139 | ST057372 | 0.0  |      | 7.4   |      |                   |
| 140 | ST057515 | 21.7 |      | 0.0   |      |                   |
| 141 | ST057541 | 0.3  |      | 0.0   |      |                   |
| 142 | ST057580 | 97.1 | 0.0  | 90.5  | 98.6 | Bactericidal      |
| 143 | ST057630 | 4.9  |      | 0.0   |      |                   |
| 144 | ST057634 | 0.0  |      | 0.0   |      |                   |
| 145 | ST057635 | 11.5 |      | 0.0   |      |                   |
| 146 | ST057636 | 54.0 |      | 24.3  |      |                   |
| 147 | ST057637 | 0.0  |      | 0.0   |      |                   |
| 148 | ST057638 | 0.6  |      | 38.5  |      |                   |
| 149 | ST057639 | 8.1  |      | 0.0   |      |                   |
| 150 | ST057640 | 69.7 | 30.2 | 94.6  | 12.8 | Moderately active |
| 151 | ST057641 | 0.0  |      | 43.4  |      |                   |
| 152 | ST057643 | 0.0  |      | 0.0   |      |                   |
| 153 | ST057644 | 0.0  |      | 10.5  |      |                   |
| 154 | ST057645 | 0.0  |      | 14.6  |      |                   |
| 155 | ST057646 | 0.0  |      | 34.4  |      |                   |
| 156 | ST057647 | 56.5 | 43.5 | 97.2  | 50.5 | Moderately active |
| 157 | ST057648 | 0.0  |      | 38.9  |      |                   |
| 158 | ST057649 | 42.6 | 0.0  | 99.3  | 0.0  | Moderately active |
| 159 | ST057656 | 40.4 | 16.6 | 99.9  | 94.8 | Bactericidal      |
| 160 | ST057709 | 40.9 |      | 48.5  |      |                   |
| 161 | ST057710 | 88.1 | 53.7 | 93.8  | 0.0  | HIT               |
| 162 | ST057711 | 67.7 | 30.4 | 75.2  |      |                   |
| 163 | ST057729 | 0.0  |      | 65.1  |      |                   |
| 164 | ST057770 | 3.6  |      | 29.2  |      |                   |
| 165 | ST058412 | 7.6  |      | 41.5  |      |                   |

|     |          |      |      |      |       |      |                   |
|-----|----------|------|------|------|-------|------|-------------------|
| 166 | ST058414 | 10.5 |      |      | 33.7  |      |                   |
| 167 | ST058433 | 9.2  |      |      | 56.1  |      |                   |
| 168 | ST058434 | 14.1 |      |      | 41.1  |      |                   |
| 169 | ST058442 | 4.3  |      |      | 31.8  |      |                   |
| 170 | ST058451 | 7.3  |      |      | 23.9  |      |                   |
| 171 | ST058458 | 23.3 |      |      | 76.3  |      |                   |
| 172 | ST058459 | 18.4 |      |      | 43.7  |      |                   |
| 173 | ST059080 | 0.0  |      | 24.6 | 92.4  | 92.1 | Bactericidal      |
| 174 | ST059081 | 14.2 |      |      | 50.8  |      |                   |
| 175 | ST059082 | 0.0  |      |      | 25.1  |      |                   |
| 176 | ST059299 | 69.0 |      | NT   | 97.9  | NT   | Moderately active |
| 177 | ST059300 | 14.7 |      |      | 19.1  |      |                   |
| 178 | ST059590 | 9.6  |      |      | 0.0   |      |                   |
| 179 | ST059616 | 3.6  |      |      | 44.2  |      |                   |
| 180 | ST059618 | 64.2 |      | 0.0  | 91.8  | 0.0  | Moderately active |
| 181 | ST059619 | 85.2 | 75.6 | 0.0  | 108.9 | 0.0  | HIT               |
| 182 | ST059620 | 1.1  |      |      | 34.0  |      |                   |
| 183 | ST059621 | 57.7 |      | 48.7 | 87.6  | 7.6  | Moderately active |
| 184 | ST059622 | 91.8 |      | 43.3 | 93.5  | 46.2 | Bactericidal      |
| 185 | ST059828 | 0.0  |      |      | 0.0   |      |                   |
| 186 | ST059837 | 85.8 | 9.6  | 3.6  | 111.1 | 0.0  | HIT               |
| 187 | ST059919 | 0.0  |      |      | 0.0   |      |                   |
| 188 | ST059922 | 8.0  |      |      | 36.1  |      |                   |
| 189 | ST059923 | 22.6 |      |      | 20.8  |      |                   |
| 190 | ST059924 | 5.9  |      |      | 0.0   |      |                   |
| 191 | ST059925 | 93.5 | 93.9 | 0.0  | 92.3  | 0.0  | HIT               |
| 192 | ST060160 | 14.4 |      |      | 6.3   |      |                   |
| 193 | ST060287 | 18.8 |      |      | 19.5  |      |                   |
| 194 | ST060837 | 0.0  |      |      | 0.0   |      |                   |
| 195 | ST065428 | 16.8 |      |      | 39.5  |      |                   |
| 196 | ST066889 | 32.6 |      |      | 77.0  |      |                   |
| 197 | ST066904 | 16.8 |      |      | 80.8  |      |                   |
| 198 | ST066973 | 3.3  |      |      | 0.0   |      |                   |
| 199 | ST069293 | 70.6 |      | 0.0  | 103.8 | 0.0  | Moderately active |
| 200 | ST069294 | 82.1 |      | 21.1 | 85.6  | 0.0  | Moderately active |
| 201 | ST069305 | 13.1 |      |      | 36.1  |      |                   |
| 202 | ST069306 | 0.0  |      |      | 0.0   |      |                   |
| 203 | ST069307 | 79.1 |      | 0.0  | 103.0 | 0.0  | Moderately active |
| 204 | ST069324 | 16.6 |      |      | 40.8  |      |                   |
| 205 | ST069348 | 3.2  |      | 45.8 | 115.8 | 0.0  | QQ                |
| 206 | ST069360 | 46.2 |      |      | 67.2  |      |                   |
| 207 | ST069833 | 20.2 |      |      | 7.6   |      |                   |
| 208 | ST070122 | 0.0  |      |      | 0.0   |      |                   |

|            |          |             |             |      |              |      |                   |
|------------|----------|-------------|-------------|------|--------------|------|-------------------|
| 209        | ST070123 | 10.6        |             |      | 0.0          |      |                   |
| 210        | ST070175 | 20.2        |             |      | 13.7         |      |                   |
| 211        | ST070176 | 11.5        |             |      | 0.0          |      |                   |
| 212        | ST070177 | 7.0         |             |      | 6.7          |      |                   |
| 213        | ST070178 | 11.8        |             |      | 52.6         |      |                   |
| 214        | ST070182 | 0.0         |             |      | 9.8          |      |                   |
| 215        | ST070203 | 0.0         |             |      | 17.9         |      |                   |
| 216        | ST070242 | 12.7        |             |      | 34.5         |      |                   |
| 217        | ST070262 | 10.5        |             |      | 75.1         |      |                   |
| 218        | ST070287 | 0.0         |             |      | 0.0          |      |                   |
| 219        | ST070634 | 1.6         |             |      | 0.0          |      |                   |
| 220        | ST070865 | 18.0        |             |      | 79.0         |      |                   |
| 221        | ST070866 | 51.1        | 7.6         |      | 96.7         | 0.0  | Moderately active |
| 222        | ST070867 | 0.0         |             |      | 54.3         |      |                   |
| 223        | ST070868 | 68.2        |             |      | 66.7         |      |                   |
| 224        | ST070869 | 52.3        |             |      | 82.6         |      |                   |
| 225        | ST070967 | 0.8         |             |      | 43.3         |      |                   |
| 226        | ST072170 | 0.0         |             |      | 0.0          |      |                   |
| 227        | ST072640 | 100.2       | 97.8        |      | 98.5         | 96.3 | Bactericidal      |
| 228        | ST072642 | 0.0         |             |      | 72.9         |      |                   |
| 229        | ST072691 | 0.0         |             |      | 0.5          |      |                   |
| 230        | ST072734 | 0.0         |             |      | 0.0          |      |                   |
| 231        | ST074453 | 0.0         |             |      | 45.1         |      |                   |
| 232        | ST074454 | 0.0         |             |      | 46.4         |      |                   |
| 233        | ST074455 | 50.8        |             |      | 74.6         |      |                   |
| 234        | ST074456 | 33.3        |             |      | 76.4         |      |                   |
| 235        | ST074488 | 26.8        |             |      | 68.9         |      |                   |
| 236        | ST074501 | 0.0         |             |      | 57.0         |      |                   |
| 237        | ST074502 | 0.0         |             |      | 0.0          |      |                   |
| 238        | ST074528 | 0.0         |             |      | 12.8         |      |                   |
| 239        | ST074529 | 2.3         |             |      | 65.8         |      |                   |
| 240        | ST074531 | 0.0         |             |      | 12.4         |      |                   |
| 241        | ST074554 | 0.0         |             |      | 54.3         |      |                   |
| 242        | ST074555 | 6.3         |             |      | 54.3         |      |                   |
| <b>243</b> | ST074562 | <b>96.5</b> | <b>96.9</b> | 0.0  | <b>101.1</b> | 0.0  | <b>HIT</b>        |
| 244        | ST074635 | 0.0         |             |      | 0.0          |      |                   |
| 245        | ST075446 | 82.6        |             | 0.0  | 100.7        | 0.0  | Moderately active |
| 246        | ST075648 | 58.9        |             | 52.4 | 95.1         | 18.7 | Moderately active |
| 247        | ST076514 | 0.0         |             |      | 0.0          |      |                   |
| 248        | ST076515 | 0.0         |             |      | 9.5          |      |                   |
| 249        | ST076521 | 17.0        |             |      | 15.9         |      |                   |
| 250        | ST076522 | 0.0         |             |      | 0.0          |      |                   |
| 251        | ST076527 | 6.9         |             |      | 2.8          |      |                   |

|            |                 |             |             |      |             |     |                   |
|------------|-----------------|-------------|-------------|------|-------------|-----|-------------------|
| 252        | ST076528        | 32.5        |             | 16.0 | 85.2        | 0.0 | Moderately active |
| 253        | ST076530        | 6.0         |             |      | 67.8        |     |                   |
| 254        | ST076533        | 3.2         |             |      | 36.9        |     |                   |
| 255        | ST076534        | 8.6         |             |      | 33.3        |     |                   |
| 256        | ST076546        | 0.0         |             |      | 63.0        |     |                   |
| 257        | ST076550        | 7.1         |             |      | 76.1        |     |                   |
| 258        | ST077089        | 14.7        |             |      | 83.6        |     |                   |
| 259        | ST077108        | 50.6        |             | 0.0  | 89.1        | 0.0 | Moderately active |
| 260        | ST077124        | 64.6        |             | NT   | 90.8        | NT  | Moderately active |
| 261        | ST077133        | 17.9        |             |      | 0.0         |     |                   |
| 262        | ST077139        | 0.0         |             |      | 0.0         |     |                   |
| 263        | ST078083        | 15.6        |             |      | 63.0        |     |                   |
| 264        | ST078115        | 6.6         |             |      | 19.8        |     |                   |
| 265        | ST078351        | 0.0         |             |      | 0.0         |     |                   |
| 266        | ST078865        | 88.9        | 42.2        | 0.0  | 89.2        | 0.0 | HIT               |
| <b>267</b> | <b>ST078866</b> | <b>94.7</b> | <b>93.5</b> | 0.0  | <b>93.6</b> | 0.0 | <b>HIT</b>        |
| 268        | ST079062        | 11.6        |             |      | 64.2        |     |                   |
| 269        | ST079153        | 0.0         |             |      | 78.9        |     |                   |
| 270        | ST079165        | 0.0         |             |      | 0.8         |     |                   |
| 271        | ST079166        | 7.7         |             |      | 3.2         |     |                   |
| 272        | ST079167        | 0.0         |             |      | 0.0         |     |                   |
| 273        | ST079544        | 0.3         |             |      | 0.0         |     |                   |
| 274        | ST079545        | 4.0         |             |      | 18.2        |     |                   |
| 275        | ST079546        | 20.5        |             |      | 0.0         |     |                   |
| 276        | ST079547        | 0.0         |             |      | 0.0         |     |                   |
| 277        | ST079548        | 0.9         |             |      | 0.0         |     |                   |
| 278        | ST079564        | 0.0         |             |      | 46.4        |     |                   |
| 279        | ST079566        | 0.0         |             |      | 30.6        |     |                   |
| 280        | ST079948        | 0.0         |             |      | 12.9        |     |                   |
| 281        | ST079949        | 3.1         |             |      | 18.8        |     |                   |
| 282        | ST079950        | 5.0         |             |      | 0.0         |     |                   |
| 283        | ST079951        | 26.4        |             |      | 30.6        |     |                   |
| 284        | ST079954        | 5.7         |             |      | 25.7        |     |                   |
| 285        | ST079961        | 0.4         |             |      | 20.8        |     |                   |
| 286        | ST079964        | 0.9         |             |      | 42.5        |     |                   |
| 287        | ST080006        | 4.5         |             |      | 25.2        |     |                   |
| 288        | ST080007        | 18.9        |             |      | 0.0         |     |                   |
| 289        | ST080024        | 22.8        |             |      | 29.2        |     |                   |
| 290        | ST080274        | 5.9         |             |      | 50.4        |     |                   |
| 291        | ST080500        | 0.0         |             |      | 0.0         |     |                   |
| 292        | ST080501        | 36.7        |             |      | 64.7        |     |                   |
| 293        | ST080512        | 0.0         |             |      | 27.7        |     |                   |
| 294        | ST080603        | 3.1         |             |      | 79.5        |     |                   |



|            |          |             |             |      |              |      |                   |
|------------|----------|-------------|-------------|------|--------------|------|-------------------|
| 295        | ST080606 | 89.1        |             | 0.0  | 71.1         | 0.0  | Moderately active |
| 296        | ST081006 | 0.0         |             |      | 6.7          |      |                   |
| 297        | ST081327 | 0.0         |             |      | 0.0          |      |                   |
| 298        | ST081356 | 98.4        |             | 90.6 | 99.8         | 94.0 | Bactericidal      |
| 299        | ST081387 | 0.0         |             |      | 37.6         |      |                   |
| 300        | ST081388 | 4.1         |             |      | 0.0          |      |                   |
| 301        | ST081389 | 0.0         |             |      | 17.8         |      |                   |
| 302        | ST081567 | 0.0         |             |      | 53.4         |      |                   |
| 303        | ST081587 | 5.4         |             |      | 26.7         |      |                   |
| 304        | ST081588 | 0.0         |             |      | 0.0          |      |                   |
| 305        | ST081598 | 0.0         |             |      | 0.0          |      |                   |
| 306        | ST081626 | 10.1        |             |      | 65.7         |      |                   |
| 307        | ST082229 | 76.1        |             | 0.0  | 93.3         | 0.0  | Moderately active |
| 308        | ST083078 | 0.0         |             |      | 24.7         |      |                   |
| 309        | ST083089 | 10.0        |             |      | 39.9         |      |                   |
| <b>310</b> | ST083092 | <b>95.9</b> | <b>92.1</b> | 0.0  | <b>105.5</b> | 0.0  | <b>HIT</b>        |
| 311        | ST083122 | 0.0         |             |      | 10.9         |      |                   |
| 312        | ST083129 | 23.1        |             |      | 16.3         |      |                   |
| 313        | ST083130 | 1.8         |             |      | 48.6         |      |                   |
| 314        | ST083652 | 9.1         |             |      | 40.8         |      |                   |
| 315        | ST083653 | 22.3        |             |      | 45.3         |      |                   |
| 316        | ST083654 | 7.9         |             |      | 69.0         |      |                   |
| 317        | ST083655 | 16.5        |             | 0.0  | 96.0         | 0.0  | QQ                |
| 318        | ST083656 | 3.0         |             |      | 47.8         |      |                   |
| 319        | ST083657 | 3.1         |             |      | 15.0         |      |                   |
| 320        | ST083658 | 19.4        |             |      | 25.0         |      |                   |
| 321        | ST083683 | 20.3        |             |      | 55.7         |      |                   |
| 322        | ST085121 | 18.3        |             |      | 0.0          |      |                   |
| 323        | ST085666 | 6.0         |             |      | 0.0          |      |                   |
| 324        | ST085667 | 6.4         |             |      | 0.0          |      |                   |
| 325        | ST085668 | 18.5        |             | 0.0  | 91.0         | 0.0  | QQ                |
| 326        | ST085669 | 12.3        |             |      | 30.0         |      |                   |
| 327        | ST085670 | 29.4        |             |      | 69.8         |      |                   |
| 328        | ST085671 | 61.1        |             | 0.0  | 91.8         | 0.0  | Moderately active |
| 329        | ST085672 | 79.9        |             | 0.0  | 96.8         | 0.0  | Moderately active |
| 330        | ST085906 | 23.5        |             |      | 44.5         |      |                   |
| 331        | ST086116 | 68.4        |             |      | 64.4         |      |                   |
| 332        | ST086243 | 93.3        |             | 0.0  | 79.4         | 0.0  | Moderately active |
| 333        | ST086510 | 0.0         |             |      | 0.0          |      |                   |
| 334        | ST086511 | 82.1        |             | 0.0  | 95.5         | 0.0  | Moderately active |
| 335        | ST086622 | 58.4        |             | 0.0  | 87.7         | 0.0  | Moderately active |
| 336        | ST088823 | 0.4         |             |      | 0.0          |      |                   |
| 337        | ST090287 | 4.3         |             |      | 0.0          |      |                   |

|     |          |      |      |      |       |                   |
|-----|----------|------|------|------|-------|-------------------|
| 338 | ST092286 | 0.0  |      | 0.0  |       |                   |
| 339 | ST092287 | 4.2  |      | 0.0  |       |                   |
| 340 | ST092291 | 37.2 |      | 83.5 |       |                   |
| 341 | ST092293 | 38.3 | 0.0  | 95.2 | 100.6 | Bactericidal      |
| 342 | ST092296 | 48.8 | 0.0  | 98.1 | 16.5  | Moderately active |
| 343 | ST092297 | 0.0  |      | 5.0  |       |                   |
| 344 | ST092710 | 0.0  |      | 0.0  |       |                   |
| 345 | ST092742 | 0.0  |      | 0.0  |       |                   |
| 346 | ST092763 | 0.0  |      | 22.4 |       |                   |
| 347 | ST092764 | 0.0  |      | 36.1 |       |                   |
| 348 | ST093690 | 0.0  |      | 67.8 |       |                   |
| 349 | ST094800 | 0.0  |      | 0.0  |       |                   |
| 350 | ST094806 | 0.0  |      | 0.0  |       |                   |
| 351 | ST094856 | 3.4  |      | 0.0  |       |                   |
| 352 | ST094874 | 0.0  |      | 44.4 |       |                   |
| 353 | ST094877 | 0.0  |      | 27.7 |       |                   |
| 354 | ST094880 | 0.0  |      | 54.2 |       |                   |
| 355 | ST094881 | 1.4  |      | 11.1 |       |                   |
| 356 | ST094882 | 0.0  |      | 12.6 |       |                   |
| 357 | ST094883 | 0.0  |      | 11.1 |       |                   |
| 358 | ST094884 | 0.0  |      | 0.0  |       |                   |
| 359 | ST098835 | 51.7 | 0.0  | 87.5 | 0.0   | Moderately active |
| 360 | ST097864 | 0.0  |      | 69.3 |       |                   |
| 361 | ST097621 | 26.6 |      | 3.5  |       |                   |
| 362 | ST095190 | 0.2  |      | 20.2 |       |                   |
| 363 | ST095191 | 0.0  |      | 0.0  |       |                   |
| 364 | ST095192 | 0.0  |      | 0.0  |       |                   |
| 365 | ST095193 | 0.0  |      | 38.3 |       |                   |
| 366 | ST095194 | 0.0  |      | 61.0 |       |                   |
| 367 | ST095195 | 1.2  |      | 56.5 |       |                   |
| 368 | ST095196 | 0.0  |      | 67.8 |       |                   |
| 369 | ST095197 | 0.0  |      | 8.8  |       |                   |
| 370 | ST095198 | 0.0  |      | 0.0  |       |                   |
| 371 | ST095199 | 0.0  |      | 0.0  |       |                   |
| 372 | ST095200 | 0.0  |      | 2.8  |       |                   |
| 373 | ST095201 | 0.0  |      | 13.8 |       |                   |
| 374 | ST095202 | 27.5 |      | 70.2 |       |                   |
| 375 | ST095227 | 0.0  |      | 35.5 |       |                   |
| 376 | ST095411 | 99.1 | 85.9 | 99.7 | 73.1  | Bactericidal      |
| 377 | ST095412 | 77.1 |      | 81.4 |       |                   |
| 378 | ST095413 | 3.6  | 96.1 | 95.2 | 84.9  | Bactericidal      |
| 379 | ST095414 | 37.3 | 0.0  | 89.2 | 91.6  | Bactericidal      |
| 380 | ST095416 | 17.9 |      | 46.6 |       |                   |

|     |          |      |      |      |       |      |                   |
|-----|----------|------|------|------|-------|------|-------------------|
| 381 | ST095417 | 96.4 |      | 88.3 | 93.9  | 53.3 | Bactericidal      |
| 382 | ST095418 | 93.0 |      | 97.8 | 89.8  | 97.3 | Bactericidal      |
| 383 | ST095419 | 0.0  |      |      | 0.0   |      |                   |
| 384 | ST097570 | 0.0  |      |      | 0.0   |      |                   |
| 385 | ST095424 | 0.0  |      |      | 3.8   |      |                   |
| 386 | ST095787 | 94.1 |      | 91.1 | 93.7  | 82.7 | Bactericidal      |
| 387 | ST095788 | 68.2 |      | 82.1 | 96.1  | 94.1 | Bactericidal      |
| 388 | ST095795 | 0.0  |      |      | 0.0   |      |                   |
| 389 | ST095849 | 45.8 |      |      | 81.2  |      |                   |
| 390 | ST095850 | 0.0  |      |      | 0.0   |      |                   |
| 391 | ST095851 | 0.0  |      |      | 0.0   |      |                   |
| 392 | ST095852 | 0.0  |      |      | 0.0   |      |                   |
| 393 | ST096006 | 0.0  |      |      | 55.3  |      |                   |
| 394 | ST096007 | 0.0  |      |      | 11.9  |      |                   |
| 395 | ST096010 | 0.0  |      |      | 32.4  |      |                   |
| 396 | ST096990 | 0.0  |      |      | 6.3   |      |                   |
| 397 | ST097090 | 0.0  |      |      | 0.0   |      |                   |
| 398 | ST097091 | 0.0  |      |      | 0.0   |      |                   |
| 399 | ST097092 | 16.3 |      |      | 41.1  |      |                   |
| 400 | ST097093 | 21.4 |      |      | 10.0  |      |                   |
| 401 | ST097094 | 4.0  |      |      | 8.2   |      |                   |
| 402 | ST097097 | 0.0  |      |      | 31.8  |      |                   |
| 403 | ST097099 | 0.0  |      |      | 0.0   |      |                   |
| 404 | ST097101 | 0.0  |      |      | 5.7   |      |                   |
| 405 | ST097107 | 10.9 |      |      | 0.0   |      |                   |
| 406 | ST097108 | 11.1 |      |      | 27.4  |      |                   |
| 407 | ST097110 | 0.0  |      |      | 0.0   |      |                   |
| 408 | ST097111 | 0.0  |      |      | 0.0   |      |                   |
| 409 | ST097117 | 0.0  |      |      | 10.0  |      |                   |
| 410 | ST097121 | 0.0  |      |      | 28.7  |      |                   |
| 411 | ST097125 | 10.9 |      |      | 49.1  |      |                   |
| 412 | ST097570 | 0.0  |      |      | 0.0   |      |                   |
| 413 | ST097864 | 14.4 |      |      | 31.9  |      |                   |
| 414 | ST098360 | 20.8 |      | 0.0  | 100.3 | 54.1 | Bactericidal      |
| 415 | ST098799 | 0.0  |      |      | 0.0   |      |                   |
| 416 | ST098835 | 81.7 |      |      | 83.9  |      |                   |
| 417 | ST031410 | 53.9 |      |      | 23.9  |      |                   |
| 418 | ST032792 | 4.2  |      |      | 16.6  |      |                   |
| 419 | ST055359 | 0.0  |      |      | 34.2  |      |                   |
| 420 | ST055365 | 4.7  |      |      | 52.6  |      |                   |
| 421 | ST055990 | 3.3  |      |      | 0.0   |      |                   |
| 422 | ST056006 | 0.0  |      |      | 51.8  |      |                   |
| 423 | ST056011 | 48.2 | 19.3 | 47.0 | 88.9  | 0.0  | Moderately active |

|     |           |      |      |      |       |      |              |
|-----|-----------|------|------|------|-------|------|--------------|
| 424 | ST097095  | 7.7  |      |      | 12.4  |      |              |
| 425 | ST097096  | 0.0  |      |      | 22.8  |      |              |
| 426 | ST097100  | 6.0  |      |      | 9.8   |      |              |
| 427 | ST097104  | 6.5  |      |      | 17.4  |      |              |
| 428 | ST097105  | 2.5  |      |      | 27.0  |      |              |
| 429 | ST097106  | 4.7  |      |      | 24.3  |      |              |
| 430 | ST097122  | 0.0  |      |      | 33.3  |      |              |
| 431 | ST097123  | 0.0  |      |      | 37.6  |      |              |
| 432 | ST097132  | 0.0  |      |      | 27.3  |      |              |
| 433 | ST097133  | 0.0  |      |      | 20.8  |      |              |
| 434 | ST097134  | 0.0  |      |      | 25.3  |      |              |
| 435 | ST097142  | 6.0  |      |      | 54.4  |      |              |
| 436 | ST097143  | 6.6  |      |      | 26.6  |      |              |
| 437 | ST097144  | 0.0  |      |      | 24.1  |      |              |
| 438 | ST097145  | 0.0  |      |      | 34.8  |      |              |
| 439 | ST097428  | 88.3 | 43.0 | 0.0  | 100.7 | 4.2  | HIT          |
| 440 | ST097701  | 0.4  |      |      | 36.6  |      |              |
| 441 | ST098942  | 0.0  |      |      | 76.9  |      |              |
| 442 | ST098943  | 24.8 |      |      | 4.5   |      |              |
| 443 | ST098944  | 0.0  |      |      | 0.0   |      |              |
| 444 | ST098945  | 0.0  |      |      | 12.8  |      |              |
| 445 | ST098946  | 28.2 |      |      | 54.1  |      |              |
| 446 | ST098947  | 5.7  |      |      | 40.3  |      |              |
| 447 | ST098948  | 3.9  |      |      | 25.6  |      |              |
| 448 | ST098949  | 0.0  |      |      | 33.3  |      |              |
| 449 | ST098950  | 1.0  |      |      | 37.6  |      |              |
| 450 | ST098951  | 11.2 |      |      | 27.3  |      |              |
| 451 | ST098952  | 17.1 |      |      | 20.8  |      |              |
| 452 | ST098953  | 14.4 |      |      | 25.3  |      |              |
| 453 | ST098954  | 39.1 |      |      | 54.4  |      |              |
| 454 | ST098955  | 16.6 |      |      | 26.6  |      |              |
| 455 | ST098956  | 0.0  |      |      | 24.1  |      |              |
| 456 | ST098957  | 18.9 |      |      | 34.8  |      |              |
| 457 | ST098958  | 10.0 |      | 31.9 | 100.7 | 71.8 | Bactericidal |
| 458 | ST098959  | 3.9  |      |      | 36.6  |      |              |
| 459 | ST098960  | 1.5  |      |      | 76.9  |      |              |
| 460 | ST098961  | 11.8 |      |      | 4.5   |      |              |
| 461 | ST098962  | 9.6  |      |      | 0.0   |      |              |
| 462 | ST098963  | 5.6  |      |      | 12.8  |      |              |
| 463 | ST098976  | 6.5  |      |      | 54.1  |      |              |
| 464 | ST098978  | 10.9 |      |      | 40.3  |      |              |
| 465 | ST098979  | 19.1 |      |      | 25.6  |      |              |
| QUE | Quercetin | 70.5 |      | 0.0  | 93.4  | 0.0  | Control      |

**HIT** ( $n = 12$ ): active on both strains (>85% inhibition), not bactericidal; **LEAD** ( $n = 5$ ): the most active compounds, ( $IC_{50}$ s 3.69–23.35  $\mu$ M); **QQ** ( $n = 3$ ): active on the mutant CV026 strain (>85% inhibition), but <20% inhibition on the parent strain, Quorum Quenchers; **Moderately active** ( $n = 31$ ): active on one strain (>85% inhibition), 20%–84% inhibition on the other strain; **Bactericidal** ( $n = 24$ ): bactericidal to either one or both of the strains.

Statistical performance of the assay during the screening:

|     | <i>C. violaceum</i> ATCC 31532 |           | <i>C. violaceum</i> CV026 |           |
|-----|--------------------------------|-----------|---------------------------|-----------|
|     | <u>mean</u>                    | <u>SD</u> | <u>mean</u>               | <u>SD</u> |
| S/N | 6.29                           | 1.54      | 5.86                      | 1.74      |
| S/B | 8.29                           | 1.17      | 4.70                      | 1.54      |
| Z'  | 0.47                           | 0.11      | 0.42                      | 0.15      |

**Table S3.** Effect on biofilms viability measured for all compounds against all *P. aeruginosa* and *E. coli* strains.

|               |      | Viability at 400 $\mu$ M (Resazurin) |       |       |
|---------------|------|--------------------------------------|-------|-------|
|               |      | % Inhibition                         | $\pm$ | SEM   |
| EC10536       | F117 | 10.48                                | $\pm$ | 4.05  |
|               | F191 | 29.25                                | $\pm$ | 2.37  |
|               | F243 | 24.67                                | $\pm$ | 0.33  |
|               | F267 | -0.13                                | $\pm$ | 3.39  |
|               | F310 | 0.02                                 | $\pm$ | 3.03  |
|               | QUE  | -6.66                                | $\pm$ | 2.65  |
| EC700928      | F117 | 12.73                                | $\pm$ | 4.80  |
|               | F191 | 35.03                                | $\pm$ | 0.07  |
|               | F243 | 40.89                                | $\pm$ | 0.45  |
|               | F267 | -26.54                               | $\pm$ | 2.22  |
|               | F310 | -1.98                                | $\pm$ | 2.41  |
|               | QUE  | 1.54                                 | $\pm$ | 2.66  |
| PA9027        | F117 | -32.42                               | $\pm$ | 14.71 |
|               | F191 | 49.45                                | $\pm$ | 11.61 |
|               | F243 | -1.71                                | $\pm$ | 61.04 |
|               | F267 | -37.64                               | $\pm$ | 10.70 |
|               | F310 | -27.36                               | $\pm$ | 30.76 |
|               | QUE  | -3.99                                | $\pm$ | 27.89 |
| PA15442       | F117 | -24.15                               | $\pm$ | 6.07  |
|               | F191 | 22.19                                | $\pm$ | 24.13 |
|               | F243 | -12.62                               | $\pm$ | 21.16 |
|               | F267 | -23.02                               | $\pm$ | 3.18  |
|               | F310 | -19.37                               | $\pm$ | 10.95 |
|               | QUE  | -23.76                               | $\pm$ | 4.03  |
| PAO1          | F117 | 14.50                                | $\pm$ | 3.19  |
|               | F191 | 52.83                                | $\pm$ | 33.62 |
|               | F243 | 4.65                                 | $\pm$ | 6.66  |
|               | F267 | -6.31                                | $\pm$ | 9.28  |
|               | F310 | -20.44                               | $\pm$ | 1.14  |
|               | QUE  | 8.49                                 | $\pm$ | 1.07  |
| PA700829      | F117 | 6.68                                 | $\pm$ | 8.04  |
|               | F191 | 30.36                                | $\pm$ | 1.43  |
|               | F243 | -6.65                                | $\pm$ | 0.42  |
|               | F267 | -10.49                               | $\pm$ | 9.56  |
|               | F310 | -26.18                               | $\pm$ | 7.96  |
|               | QUE  | -4.97                                | $\pm$ | 7.97  |
| QUE-quercetin |      |                                      |       |       |
